# Supplementary material for: Behavioral and Immunohistochemical Evidence for Suppressive Effects of Goshajinkigan on Salicylate-Induced Tinnitus in Rats
Source: MDPI journal article supplement (doi:10.3390/brainsci12050587), 2022-04-30
Supplement: s1 [file s1]

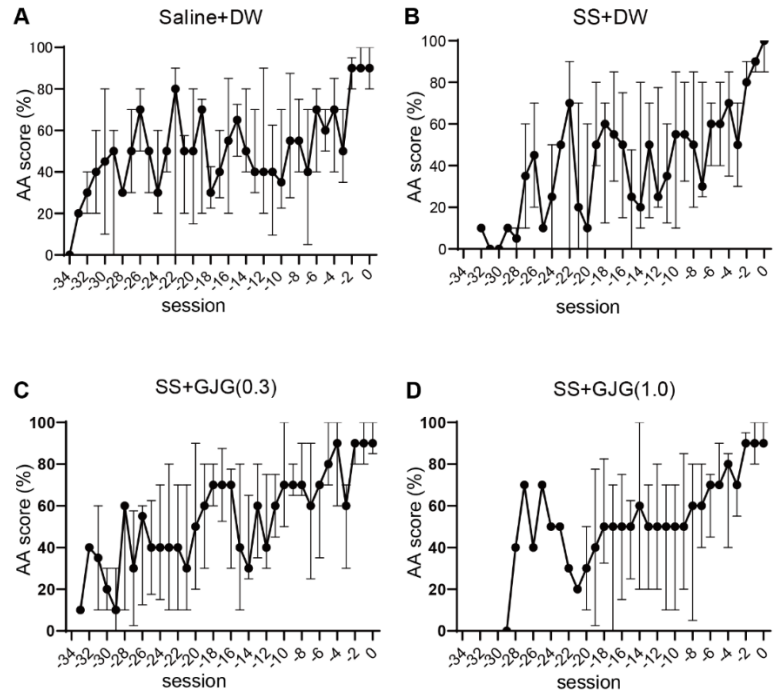

**Supplementary Figure S1.** Learning curves before behavioral tests. Rats are conditioned until their active avoidance (AA) score is at least 80% for three consecutive sessions. The horizontal axis indicates the number of sessions undergone before conditioning, with session 0 being the third session in which they succeeded three consecutive times. (A) Saline + distilled water (DW) group. (B) Sodium salicylate (SS) + DW group. (C) SS + GJG (0.3) group. (D) SS + GJG (1.0) group. Data are presented as median ( $\pm$  interquartile range),  $n = 9$  in each group.
